# Supplementary material for: Rheological and dynamic insights into an in situ reactive interphase with graft copolymers in multilayered polymer systems
Source: Royal Society of Chemistry journal article supplement (doi:10.1039/c6sm02658c), 2017-01-01
Supplement: c6sm02658c1.pdf [file c6sm02658c1.pdf]

## Electronic Supplementary Information

### Rheological and dynamic insights into the *in situ* reactive interphase with graft copolymer in multilayered polymer systems

Bo Lu,<sup>a</sup> Khalid Lamnawar,<sup>a\*</sup> Abderrahim Maazouz<sup>a, b\*</sup>

<sup>a</sup> *Université de Lyon, CNRS, UMR 5223, Ingénierie des Matériaux Polymères, INSA Lyon, F-69621, Villeurbanne, France;*

<sup>b</sup> *Hassan II Academy of Science and Technology, Rabat, Morocco*

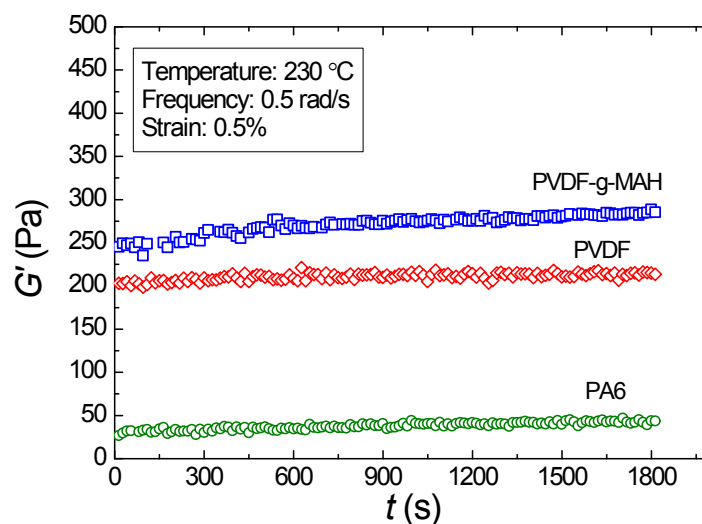

**Fig. S1** Plots of storage modulus  $G'$  for neat polymers as a function of healing time measured at 230 °C with an angular frequency of 0.5 rad/s and strain of 0.5%.

---

\* Corresponding authors:

[khalid.lamnawar@insa-lyon.fr](mailto:khalid.lamnawar@insa-lyon.fr) (K. Lamnawar);

[abderrahim.maazouz@insa-lyon.fr](mailto:abderrahim.maazouz@insa-lyon.fr) (A. Maazouz)

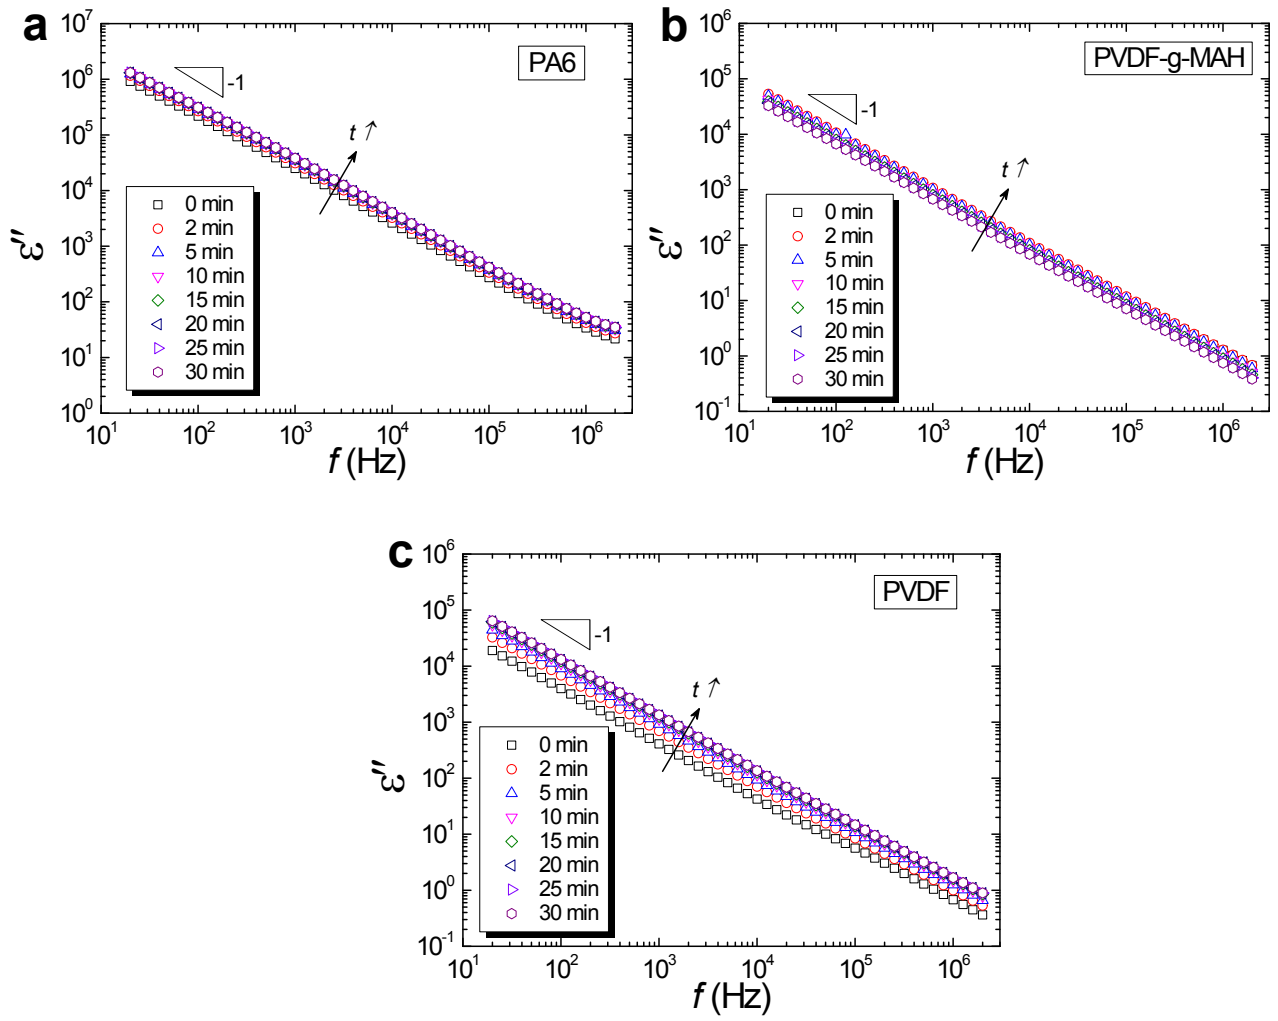

**Fig. S2** Dielectric loss permittivity  $\epsilon''$  as a function of frequency with healing time at 230 °C for (a) PA6, (b) PVDF-g-MAH, (c) PVDF.

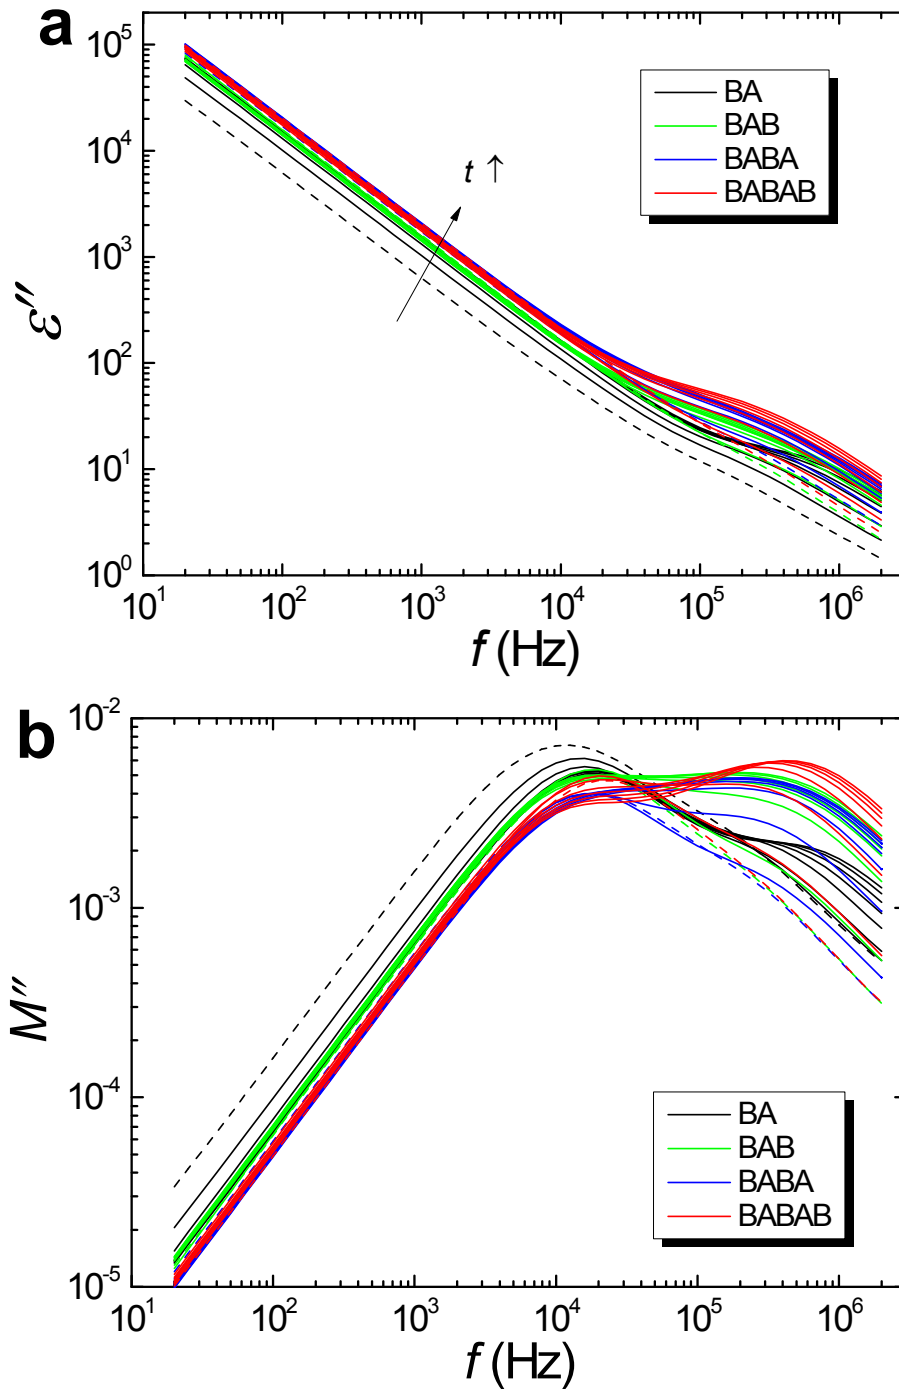

**Fig. S3** Dielectric loss permittivity  $\epsilon''$  (a) and loss modulus  $M''$  (b) as a function of frequency with healing time from 0 to 30 min at 230 °C measured for PA6/PVDF-g-MAH bilayer and their multilayers with different number of layers (“A” stands for PA6, “B” represents PVDF-g-MAH). The dashed lines indicate the responses at time of 0 min.

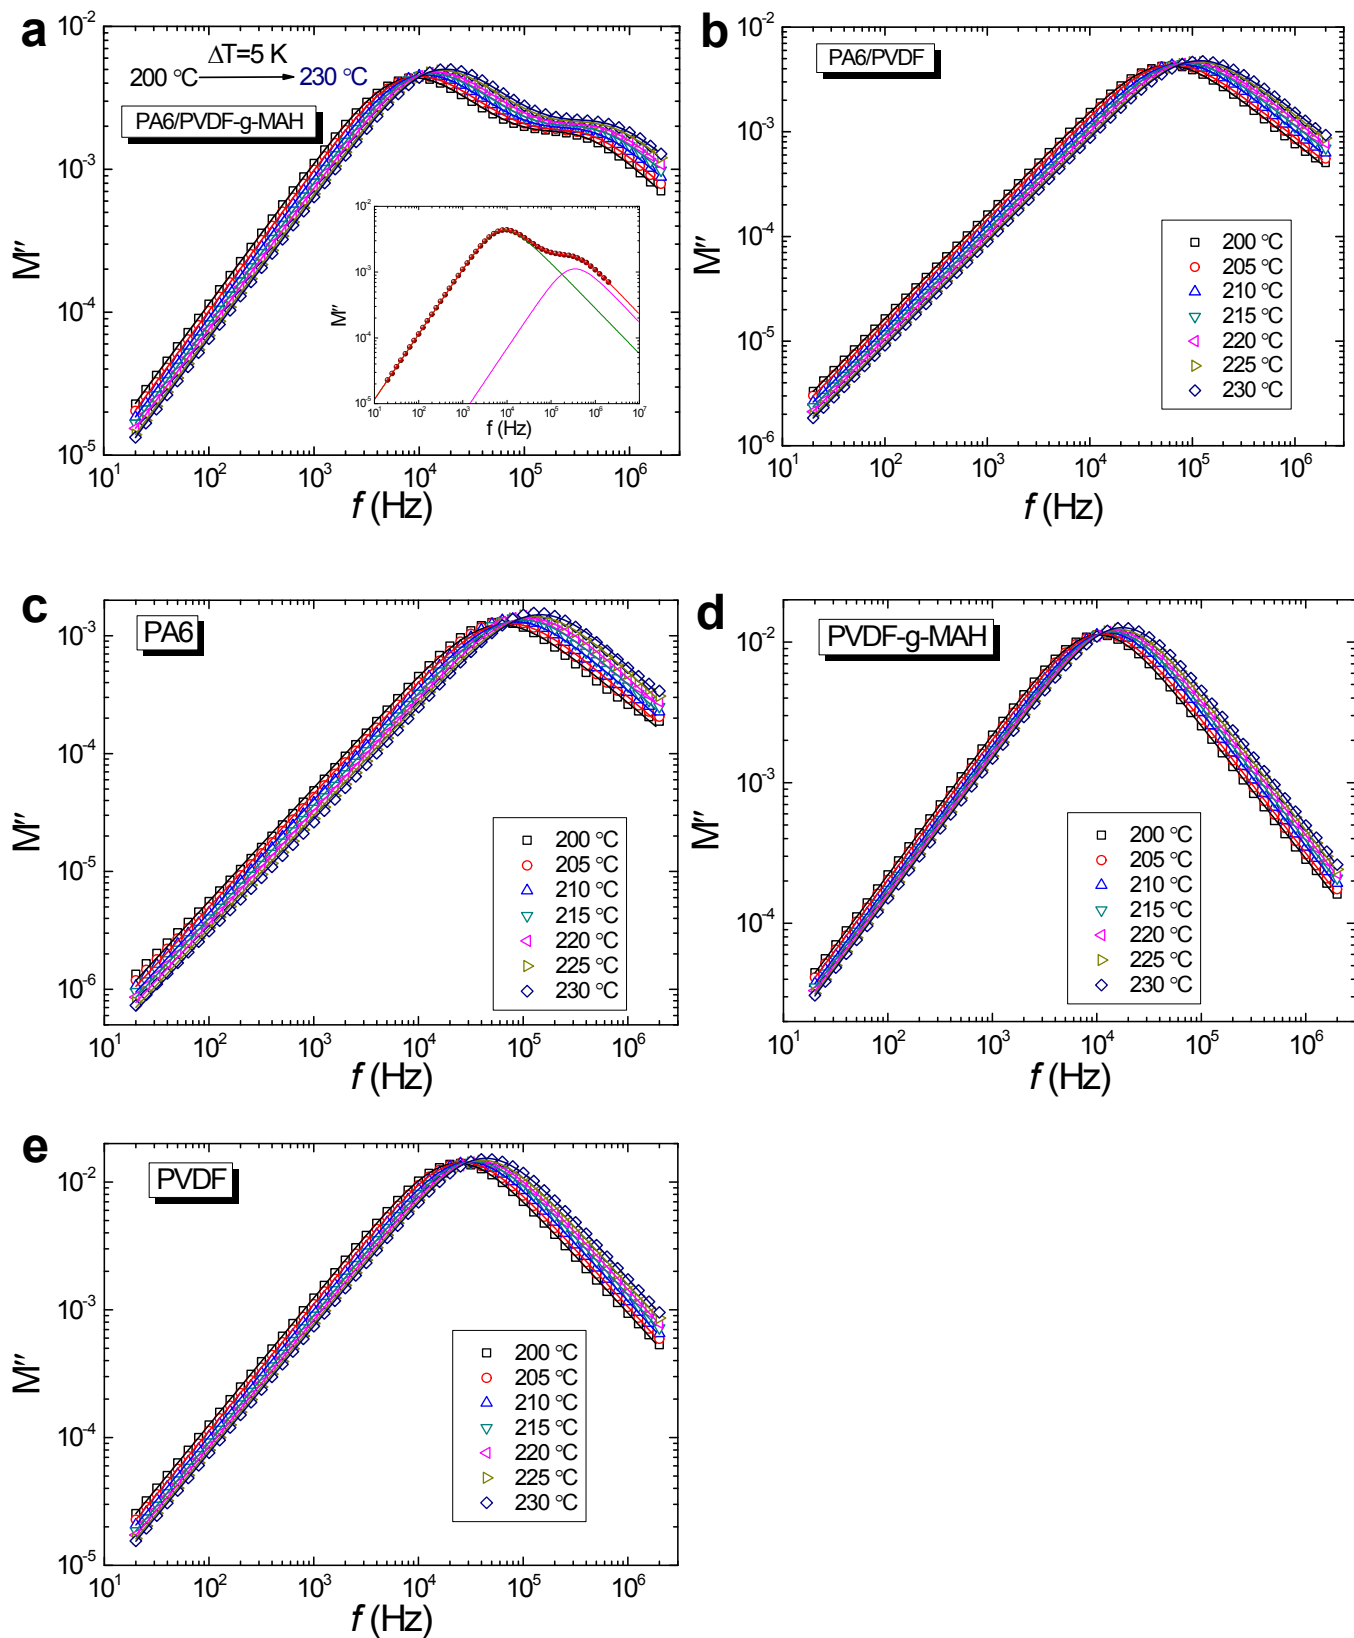

**Fig. S4** Dielectric loss modulus  $M''$  as a function of frequency with temperature ranging from 200 °C to 230 °C (5 °C step) for (a) PA6/PVDF-g-MAH bilayer, (b) PA6/PVDF bilayer, (c) PA6, (d) PVDF-g-MAH, and (e) PVDF. The solid curves are fitted lines by the Havriliak–Negami (HN) equation. Inset in (a) shows an example of HN fitting for  $M''$ .

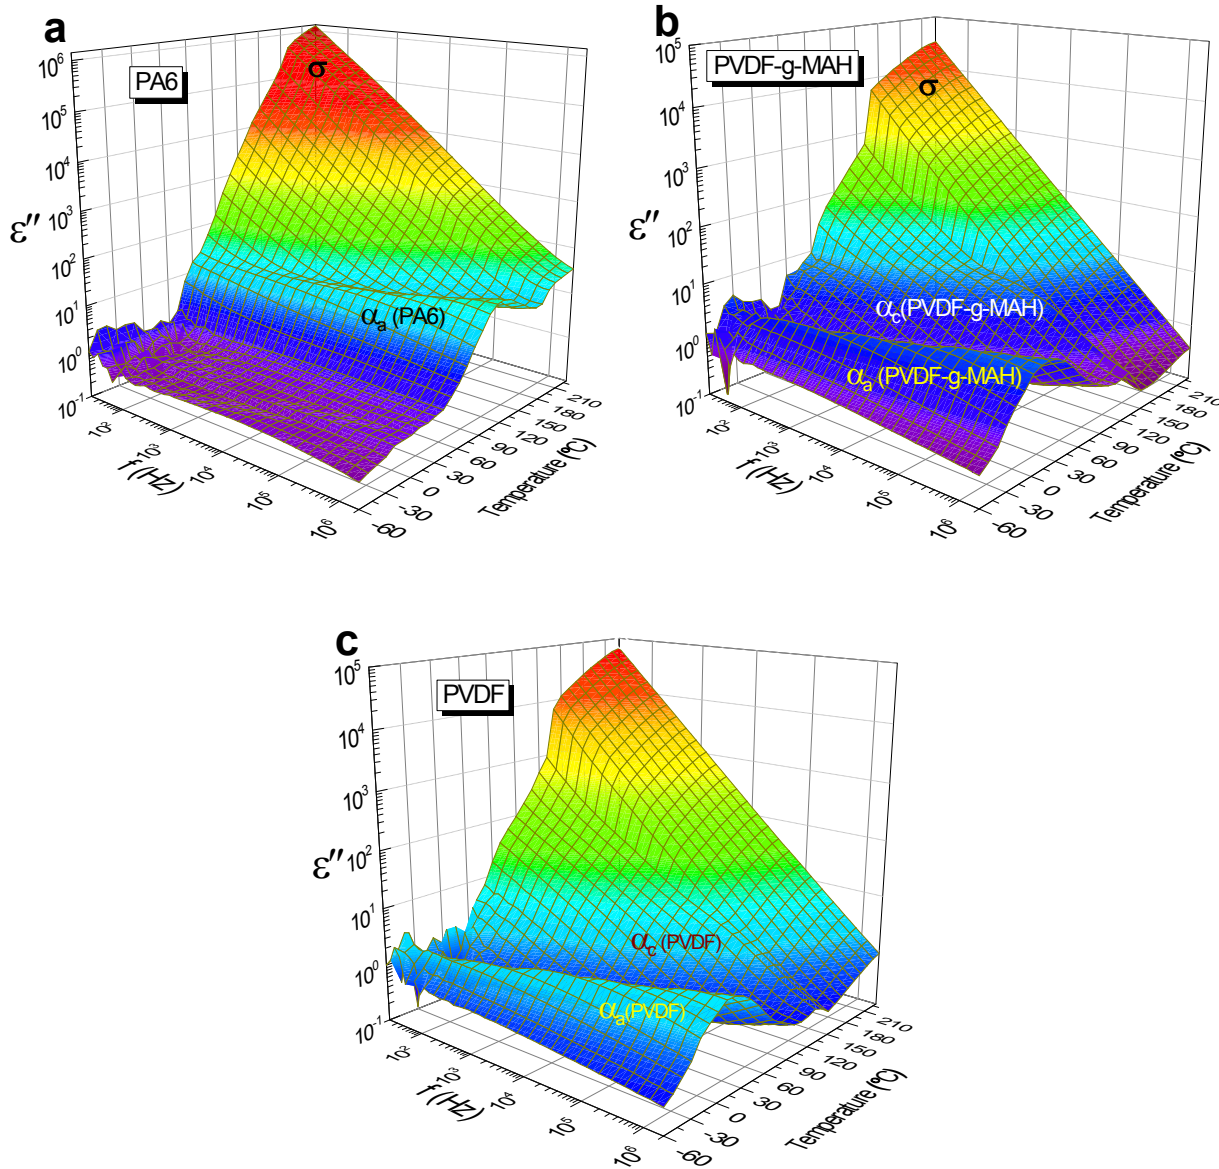

**Fig. S5** 3D dielectric loss spectra as a function of temperature and frequency for (a) PA6, (b) PVDF-g-MAH and (c) PVDF.

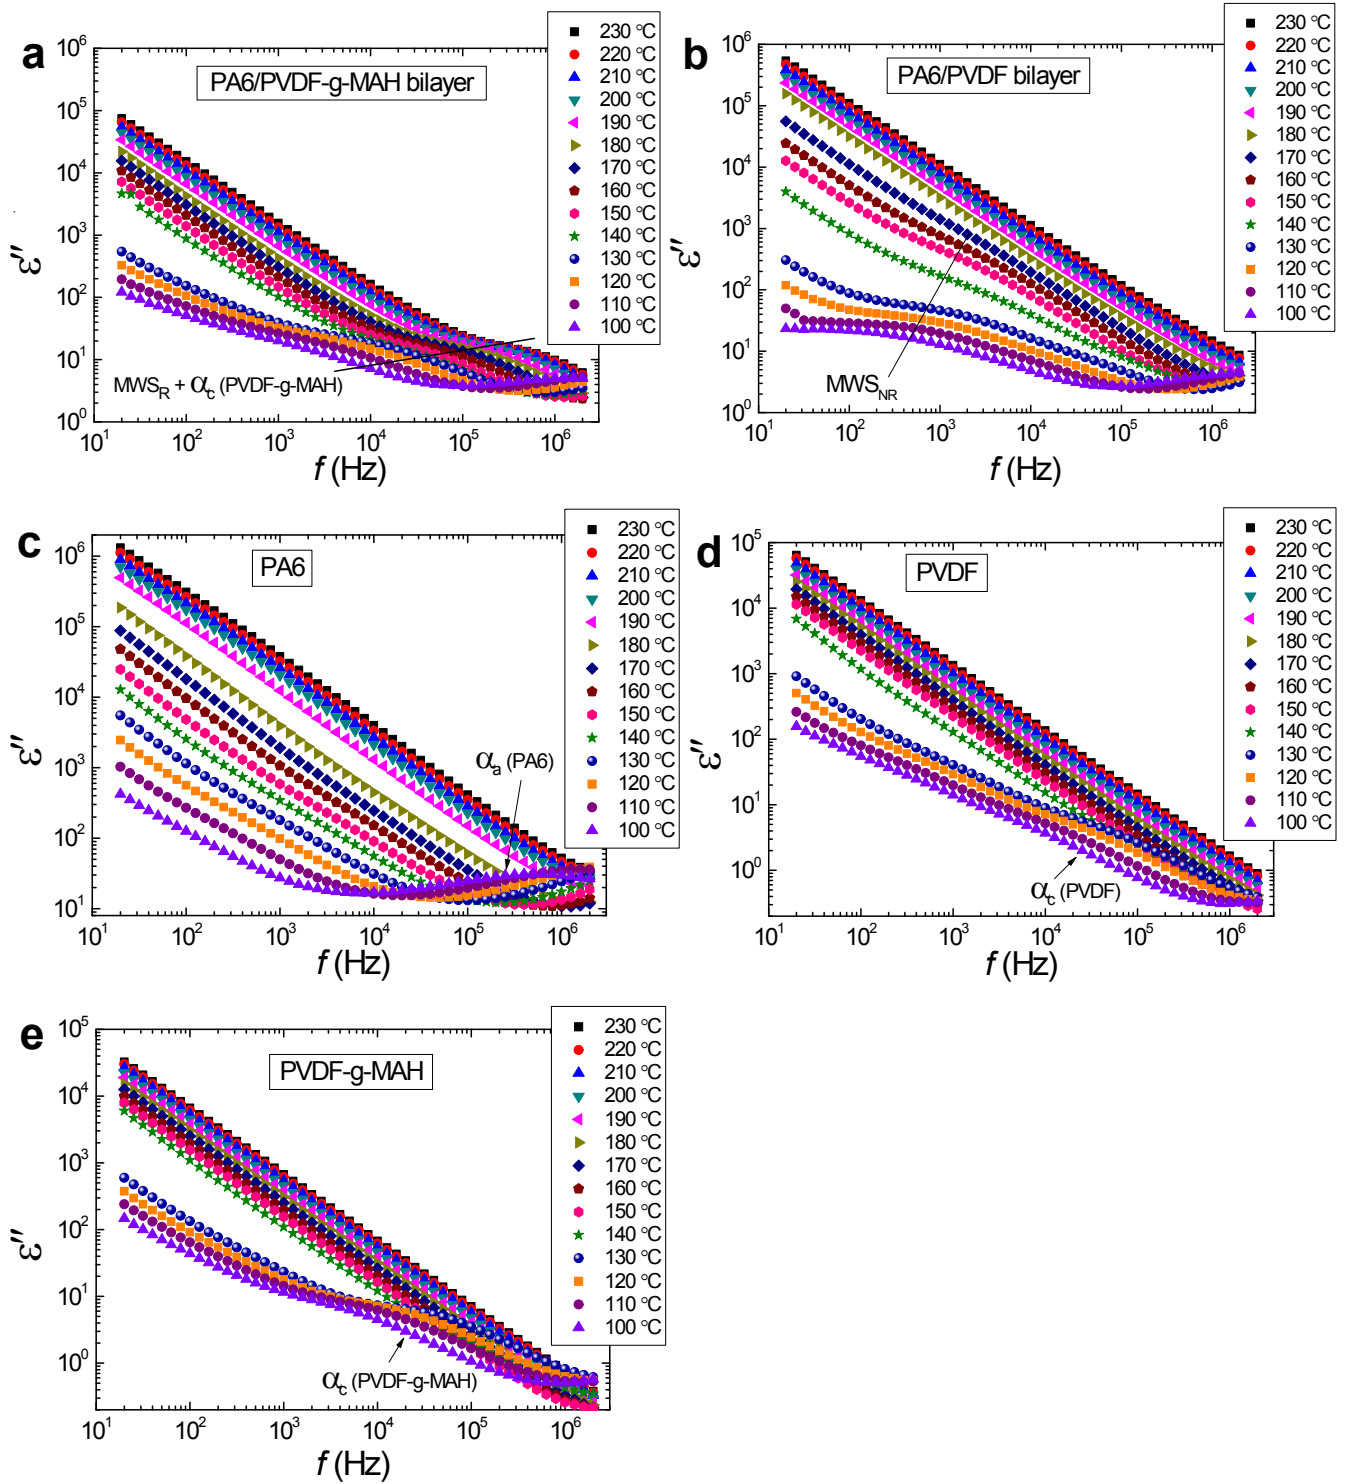

**Fig. S6** Dielectric loss permittivity  $\epsilon''$  as a function of frequency with recorded by a cooling process at a rate of 5 °C/min after the 30 min healing for (a) PA6/PVDF-g-MAH bilayer, (b) PA6/PVDF bilayer, (c) PA6, (d) PVDF and (e) PVDF-g-MAH.

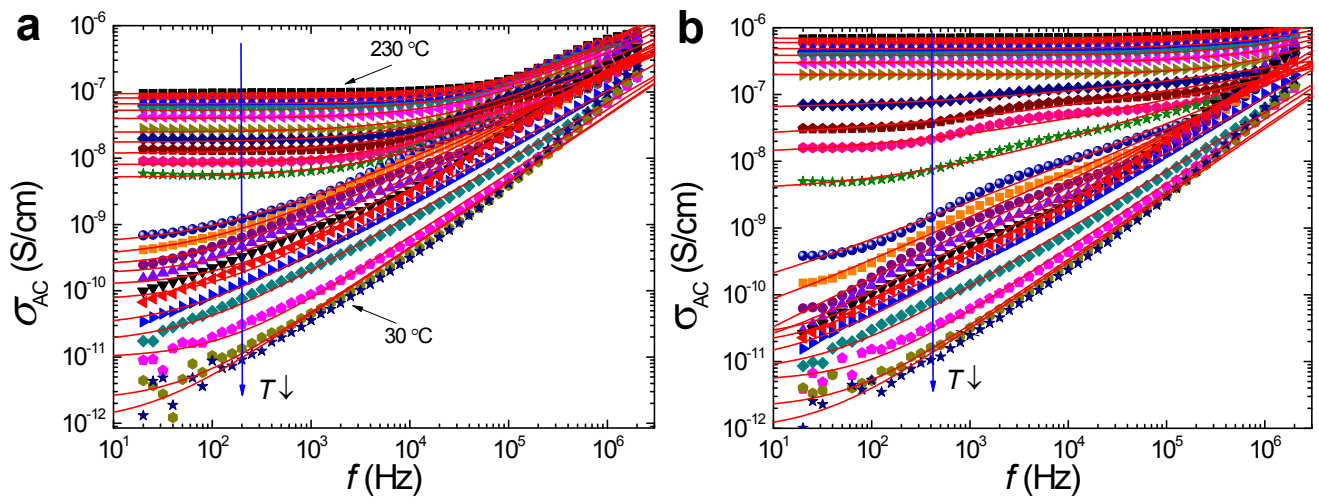

**Fig. S7** AC conductivity ( $\sigma_{AC}$ ) as a function of temperature (10 °C decrement) recorded by a cooling process at a rate of 5 °C/min after the 30 min heating for (a) PA6/PVDF-g-MAH bilayer, and (b) PA6/PVDF bilayer. Solid lines are fitted plots by the power law.
